# Supplementary figures and images for: In-vitro effects of the antimicrobial peptide Ala8,13,18-magainin II amide on isolated human first trimester villous trophoblast cells
Source: Springer Nature journal article supplement (doi:10.1186/1477-7827-9-49), 2011-04-16

24 h

48 h

96 h

Control

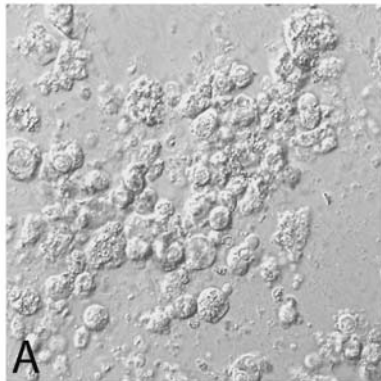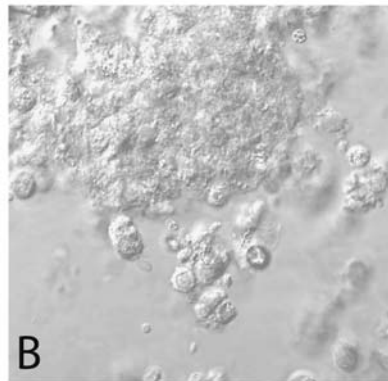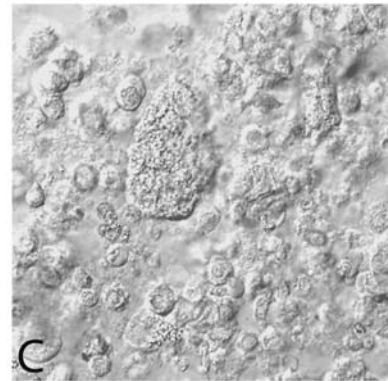

AMA

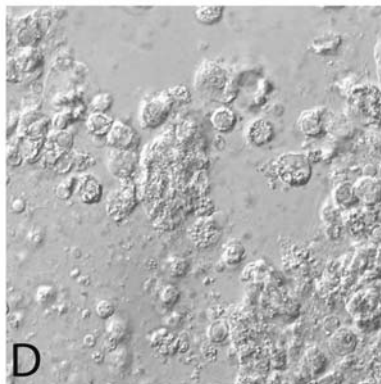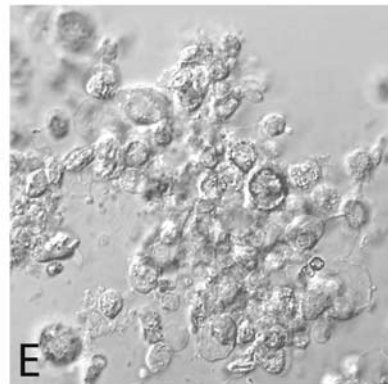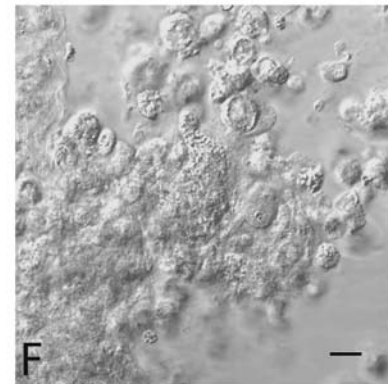

Supplement: 12958_2010_833_MOESM2_ESM.pdf [file 12958_2010_833_MOESM2_ESM.pdf]

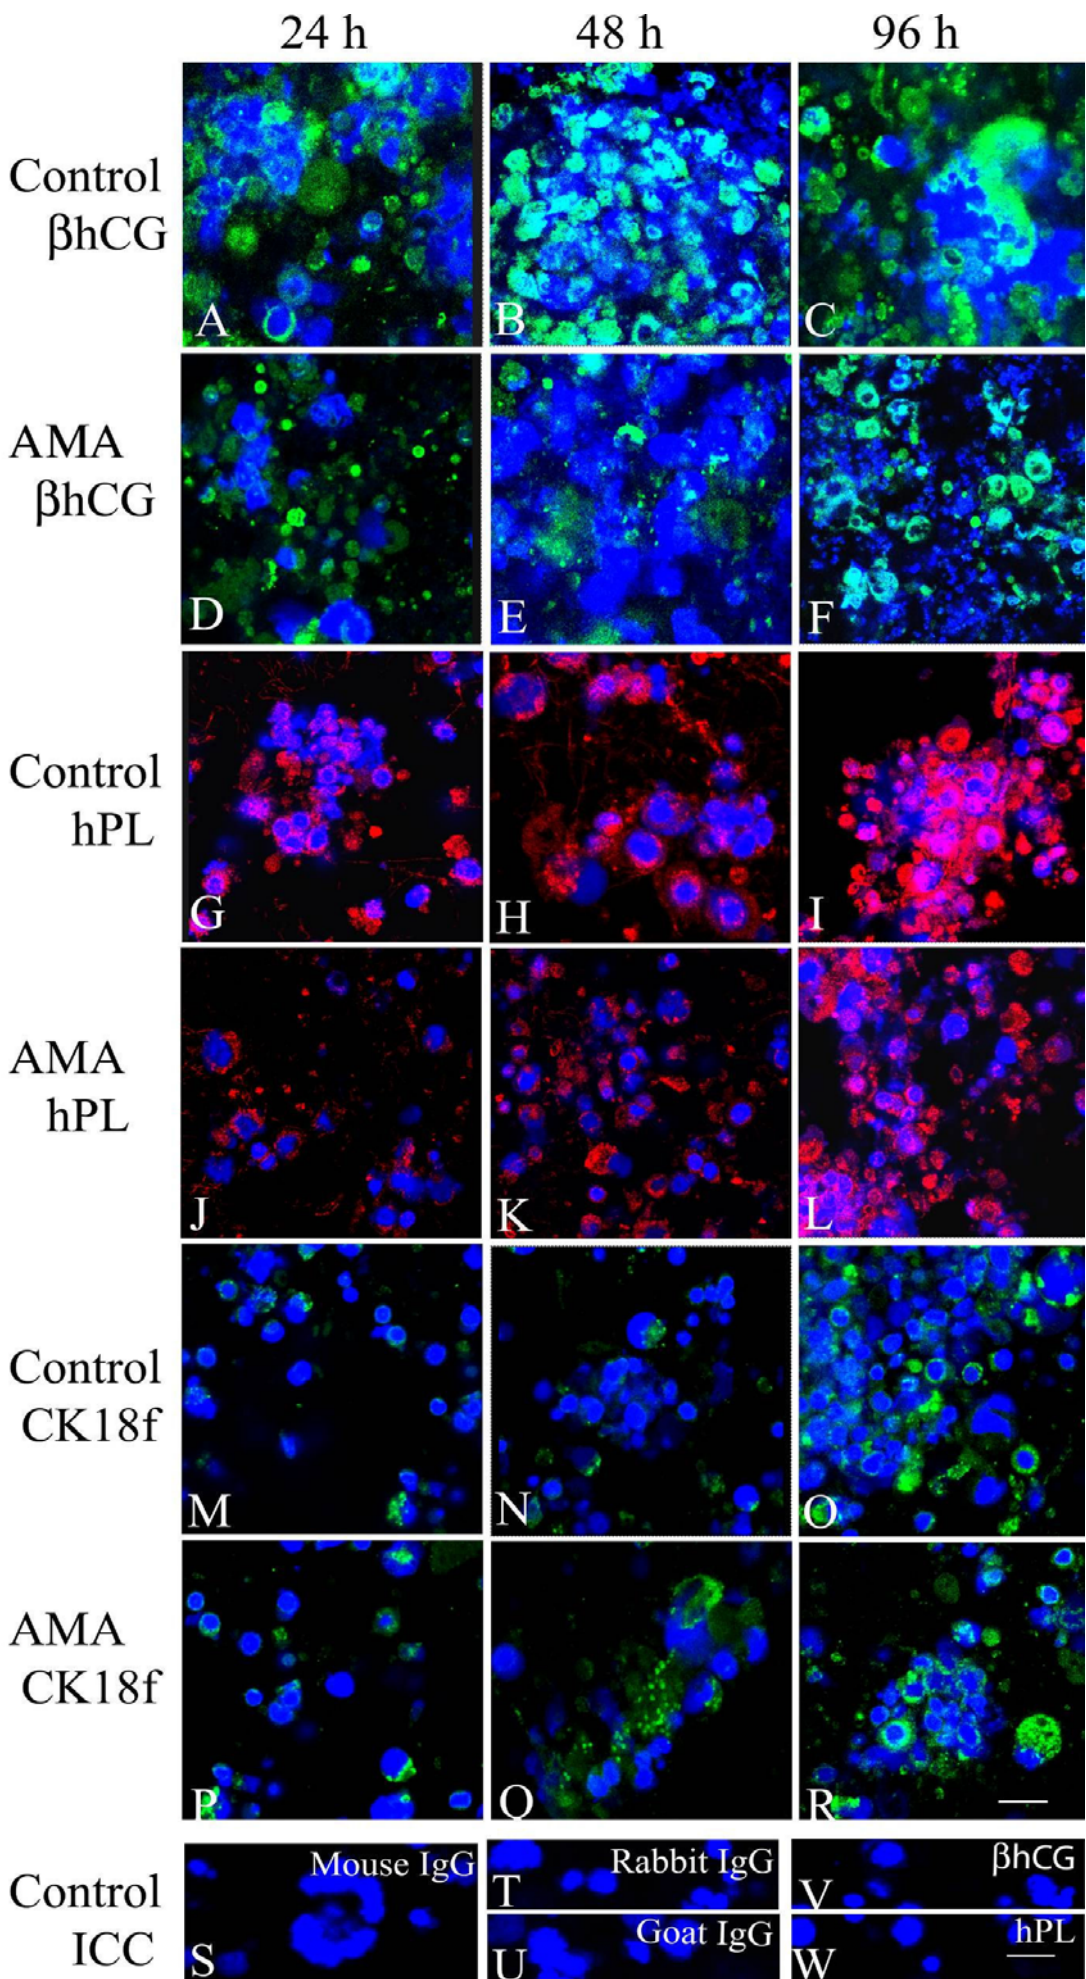

Supplement: 12958_2010_833_MOESM3_ESM.pdf [file 12958_2010_833_MOESM3_ESM.pdf]

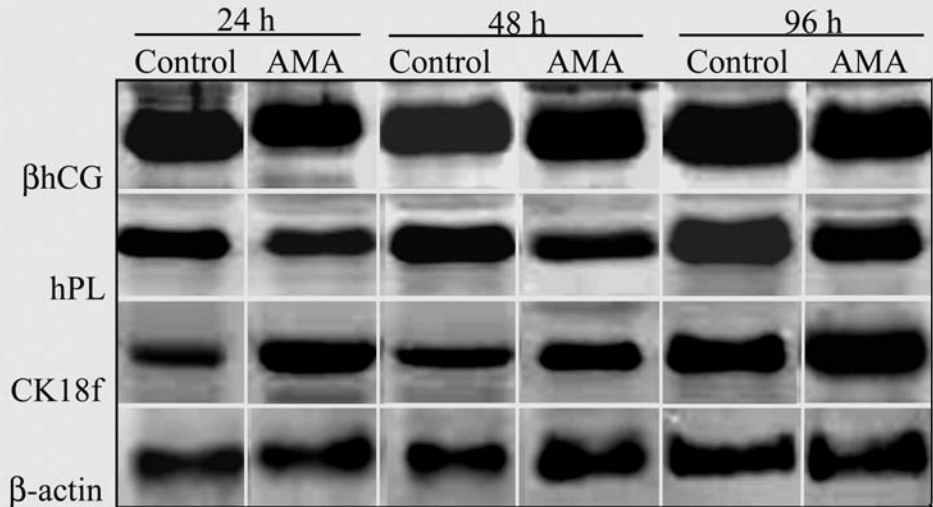

Supplement: 12958_2010_833_MOESM4_ESM.pdf [file 12958_2010_833_MOESM4_ESM.pdf]
